# Supplementary material
Source: PubMed Central journal article supplement (PMC4684260)
Supplement: NIHMS617980-supplement-Supplementary.pdf [file NIHMS617980-supplement-Supplementary.pdf]

## Supplement materials

# Engineered nanoparticles impair wound healing of the human cornea

By Zhou et al.

Supplement Table 1. The dry powder properties for 4 ENPs. SSA: (specific surface area) by nitrogen adsorption/Brunauer-Emmett-Teller (BET) method.  $d_{\text{BET}}$ : particle diameter determined from SSA and particle density,  $\rho$ , as described in methods.  $d_{\text{XRD}}$ : particle diameter by X-ray diffraction.

| Material                | SSA (m <sup>2</sup> /g) | $d_{\text{BET}}$ (nm) | $d_{\text{XRD}}$ (nm) | $\rho$ (g/cm <sup>3</sup> ) |
|-------------------------|-------------------------|-----------------------|-----------------------|-----------------------------|
| EVONIK SiO <sub>2</sub> | 50                      | 55                    | NA                    | 2.2                         |
| Sigma Aldrich CuO       | 17.3                    | 58.0                  | 22                    | 6.31                        |
| Alfa Aesar ZnO          | 13                      | 83                    | 66.8                  | 5.606                       |
| EVONIK TiO <sub>2</sub> | 50                      | 21                    | 33                    | 4.23                        |

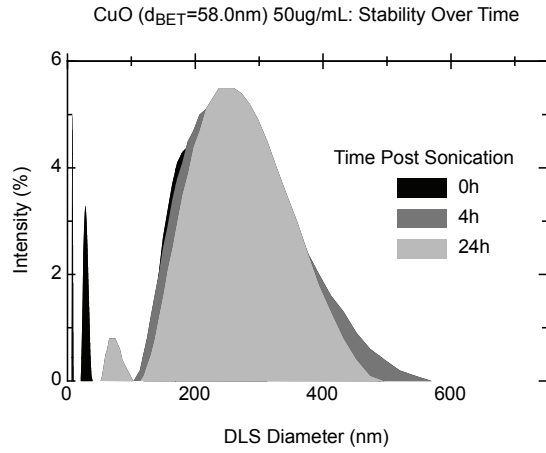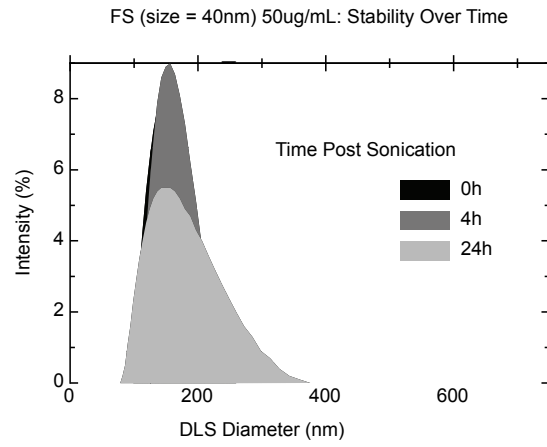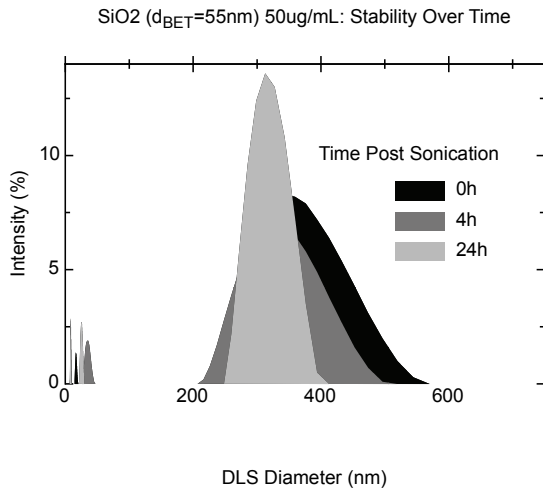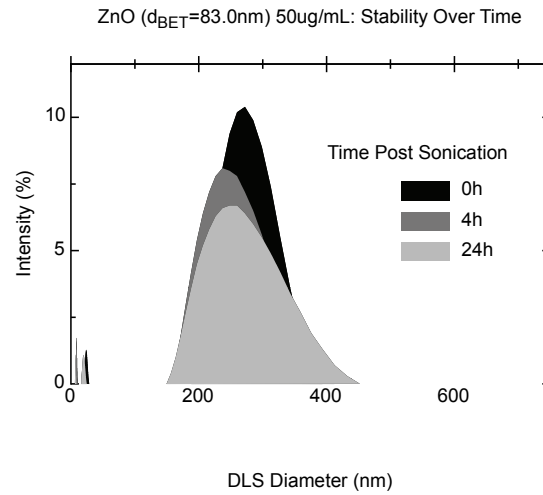

Supplement Fig. 1 Suspensions of CuO, SiO<sub>2</sub>, ZnO, and FS<sup>40nm</sup> ENPs exhibited stable particle size over time.

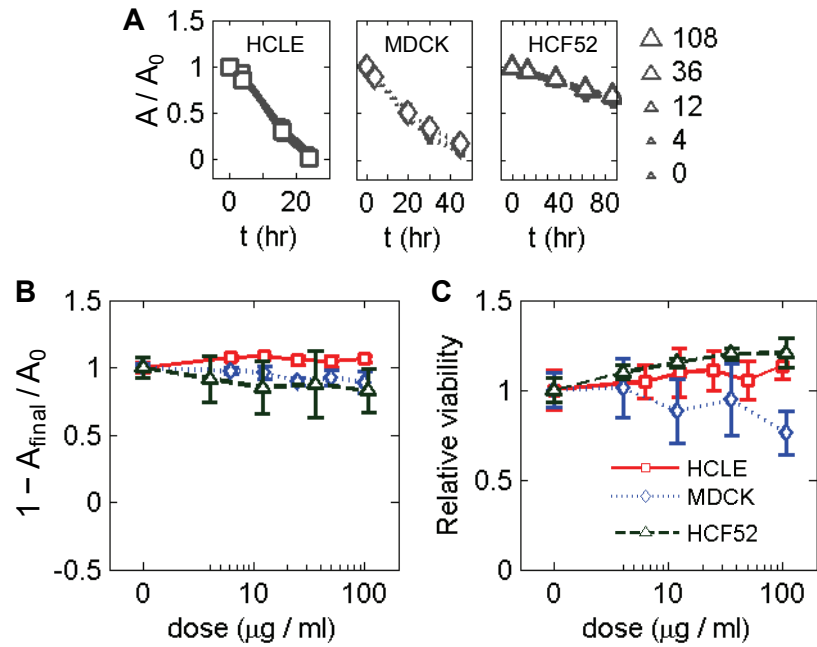

Supplement Fig. 2. SiO<sub>2</sub> ENPs exerted little impact on the wound healing rate (A, B) or the viability (C) of HCLE, MDCK and HCF52 cells. Mean  $\pm$  1.96 s.e.m. with  $n \geq 6$  wells from 2 experiments.

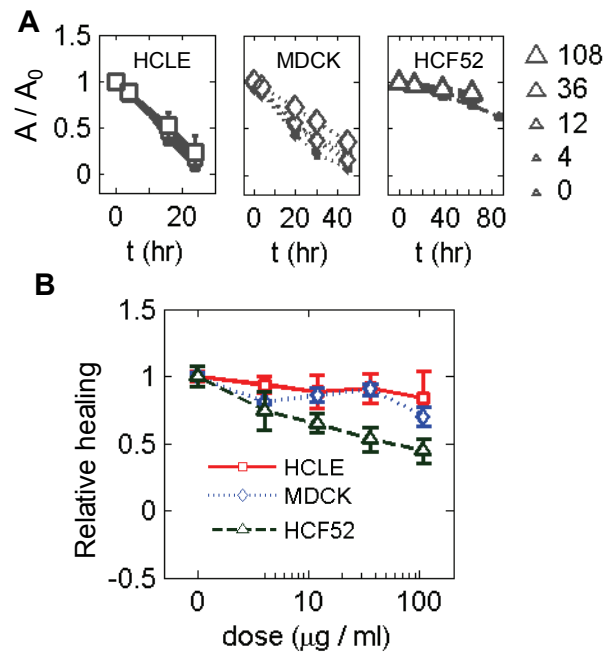

Supplement Fig. 3. Non-fluorescent, carboxylated polystyrene ENPs did not alter the wound healing rate of HCLE or MDCK cells but dose-dependently slowed down that of HCF52 cells. Mean  $\pm$  1.96 s.e.m. with  $n \geq 6$  wells from 2 experiments.

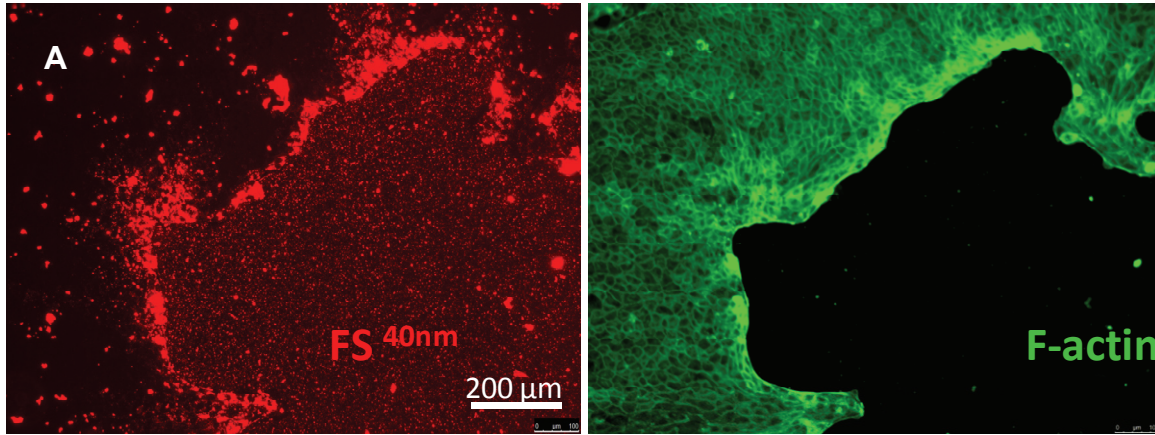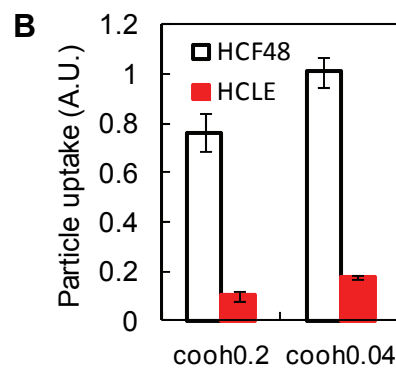

Supplement Fig. 4. (A) MDCK cells only took up FS<sup>40nm</sup> at the wound edge. There was minimal particle deposition on the interior cells. Left: fluorescent particles; right: F-actin staining. (B) Particle uptake is higher for HCF48 cells than for HCLE cells. Confluent cells were treated for one day with 12 μg/ml of FS of two sizes, and then subjected to fixation before fluorescent particles are quantified using a plate reader. Compare these data with Fig. 3E, where cells were prepared identically except for receiving fixation/permeabilization. Mean ± 1.96 s.e.m.; non-overlapping error bars indicate statistically significant difference (P < 0.05); n = 6-12 wells from 2 experiments.

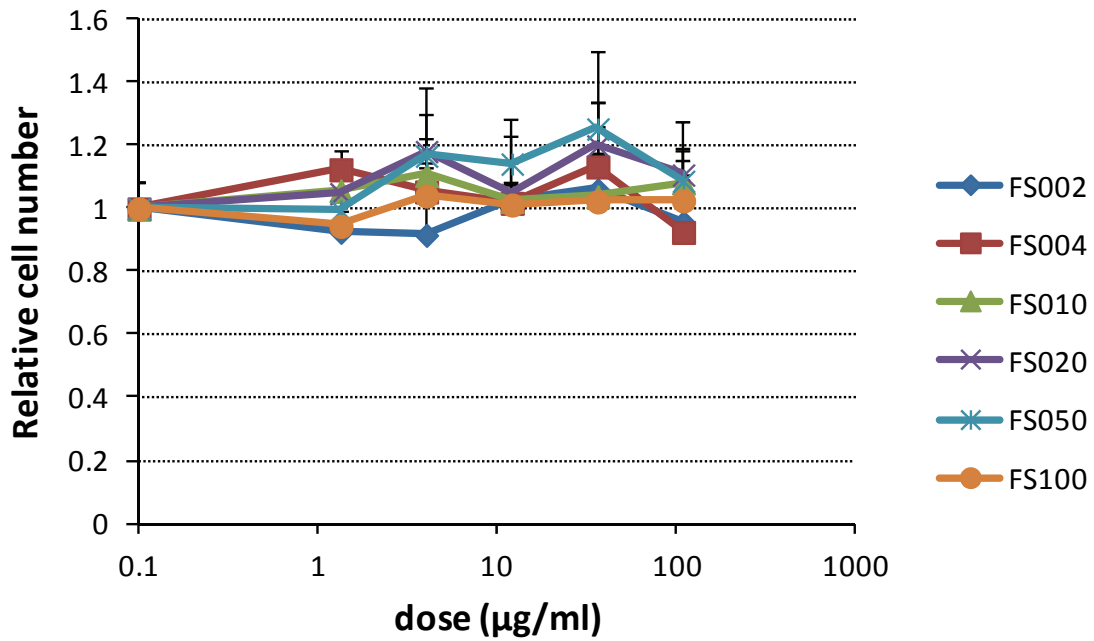

Supplement Fig. 5. Carboxylated Fluospheres do not impede cell proliferation. HCF cells were plated in a 96 well plate at 1600/w, treated with 4/3 to 108 µg/ml for two days, and counted using the cyquant assay following manufacturer’s instruction. Mean ± SD; n = 4 wells from 2 experiments.

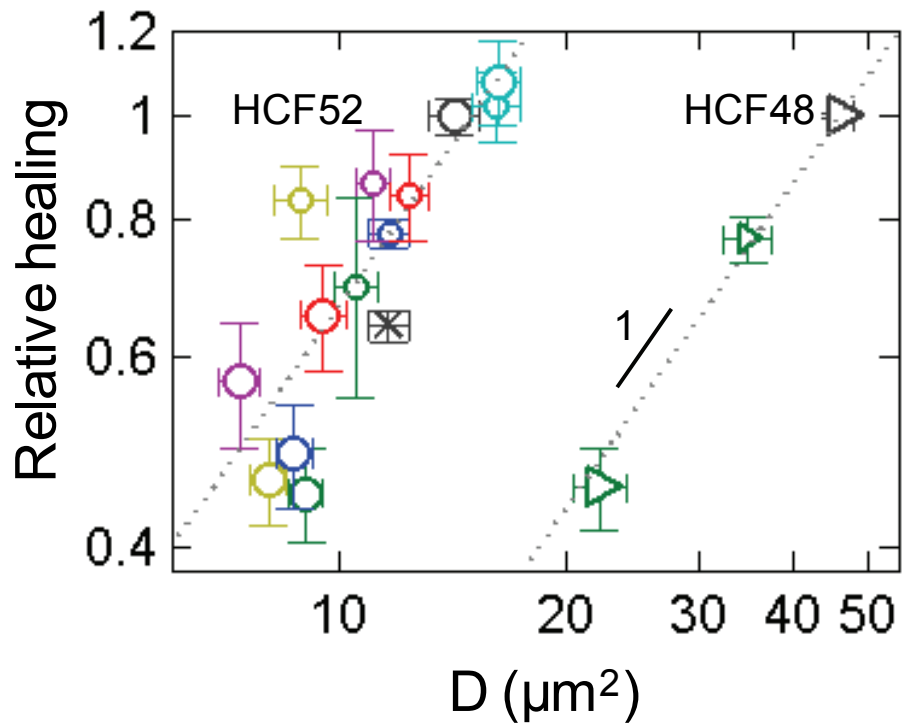

Supplement Fig. 6. The wound healing rate relative to control is proportional to cell speed,  $D$ . The fitted lines have a power-law slope of about 1 in a log-log plot. For HCF52,  $y = (0.066 \pm 0.005) * x$  and for HCF48,  $y = (0.022 \pm 0.002) * x$ ; 95% confidence interval is reported here.
